# Supplementary material for: Near-room-temperature tunable dielectric response induced by dual phase transitions in a lead-free hybrid: (C3H8N)2SbBr5
Source: Royal Society of Chemistry journal article supplement (doi:10.1039/c9ce00458k), 2019-01-01
Supplement: c9ce00458k1.pdf [file c9ce00458k1.pdf]

## Supporting Information

### Near-Room-Temperature Tunable Dielectric Response Induced by Dual Phase Transitions in a Lead-Free Hybrid: $(\text{C}_3\text{H}_8\text{N})_2\text{SbBr}_5$

Maofan Li, <sup>ab</sup> BingTeng, <sup>\*a</sup> Shiguo Han, <sup>b</sup> Tao Yang, <sup>ab</sup> Yaobin Li, <sup>b</sup> YiLiu, <sup>b</sup> Xinyuan Zhang, <sup>b</sup> Xitao Liu, <sup>b</sup> Junhua Luo <sup>b</sup> and Zhihua Sun <sup>\*b</sup>

<sup>a</sup> College of Physics, Qingdao University, Qingdao, 266071, P. R. China.

<sup>b</sup> State Key Laboratory of Structural Chemistry, Fujian Institute of Research on the structure of Matter, Chinese Academy of Sciences, Fuzhou, 350002, P. R. China.

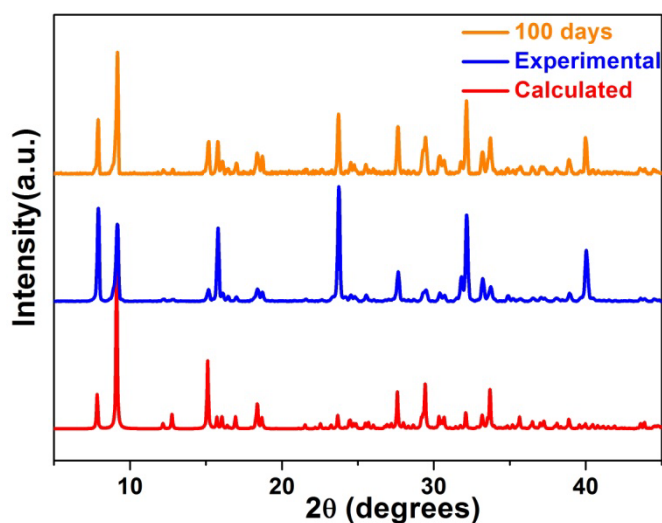

Figure S1. Powder X-ray diffraction patterns of **1** recorded on the sample after 100 days.

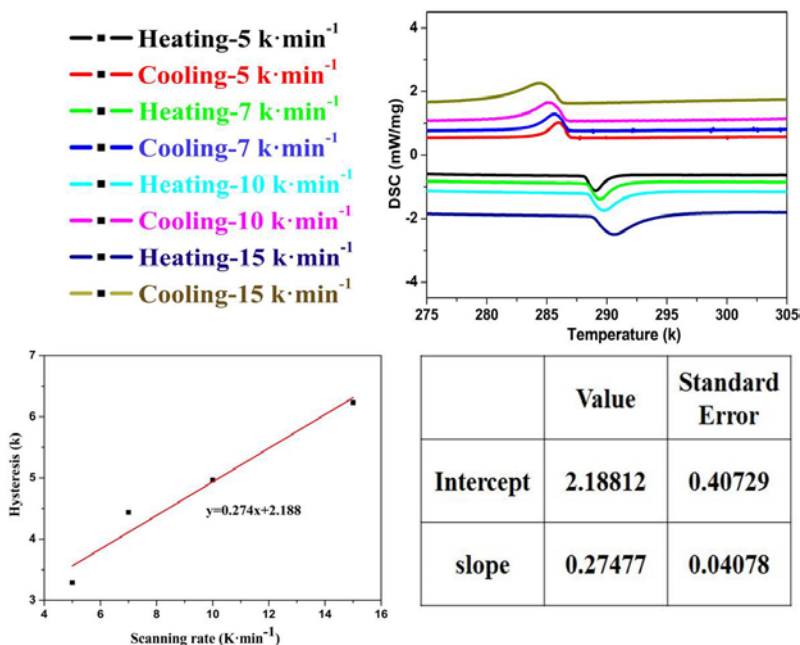

Figure S2. DSC measurements of **1** around  $T_1$  with the scanning rates of 5, 7, 10 and 15  $\text{K}\cdot\text{min}^{-1}$ .

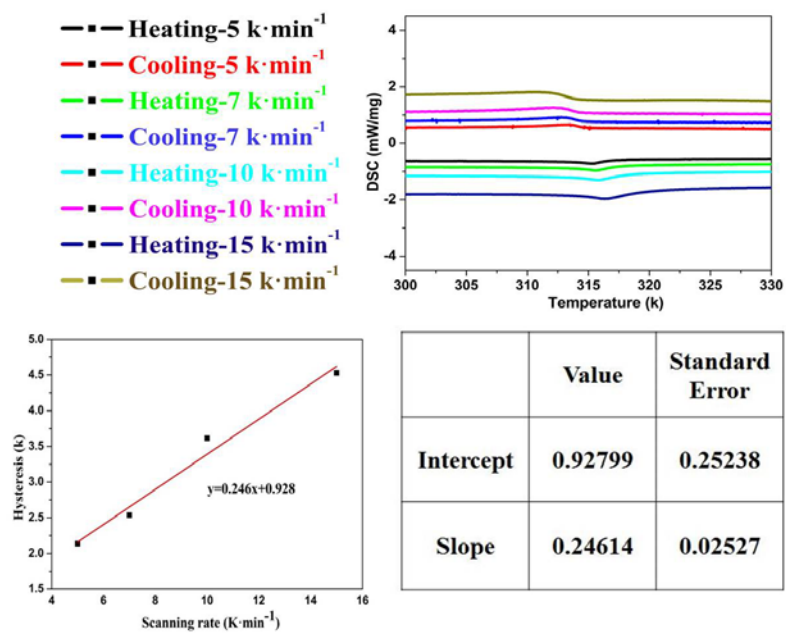

**Figure S3.** DSC measurements of **1** around  $T_2$  with the scanning rates of 5, 7, 10 and 15  $\text{K}\cdot\text{min}^{-1}$ .

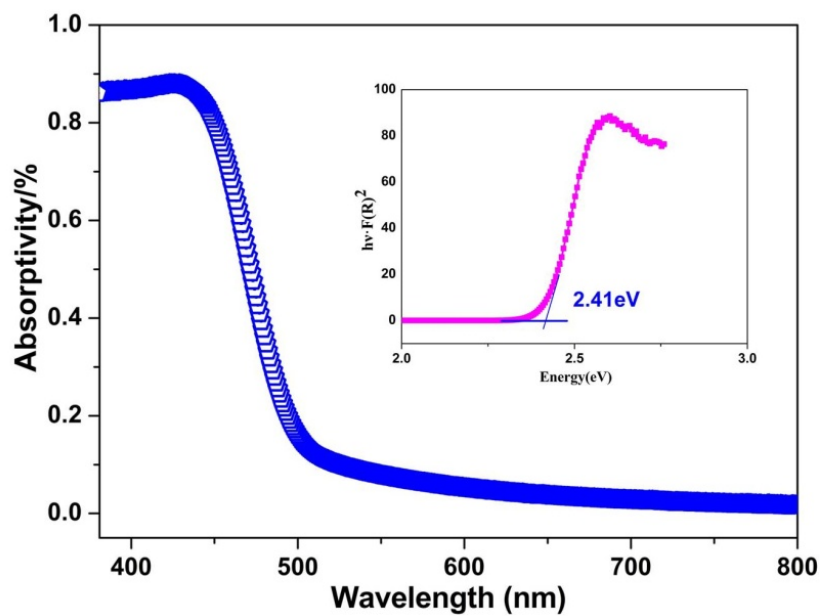

**Figure S4.** Absorption spectra with a sharp absorption edge of 525 nm. Inset: Calculation of the optical band gap using the Tauc method. The optical band gap is measured to be  $E_g = 2.41$  eV.

**Table S1** Crystal data and structure refinement for **1** at 270, 300 and 325 K.

| Phase                           | LTP                                                                | ITP                                                                | HTP                                                                |
|---------------------------------|--------------------------------------------------------------------|--------------------------------------------------------------------|--------------------------------------------------------------------|
| phase                           | (C <sub>6</sub> H <sub>16</sub> N <sub>2</sub> SbBr <sub>5</sub> ) | (C <sub>6</sub> H <sub>16</sub> N <sub>2</sub> SbBr <sub>5</sub> ) | (C <sub>6</sub> H <sub>16</sub> N <sub>2</sub> SbBr <sub>5</sub> ) |
| T (K)                           | 270 K                                                              | 300 K                                                              | 325 K                                                              |
| Formula weigh                   | 637.51                                                             | 637.51                                                             | 637.51                                                             |
| Crystallgraphic system          | Monoclinic                                                         | Orthorhombic                                                       | Orthorhombic                                                       |
| Space group                     | <i>P2<sub>1</sub>/c</i>                                            | <i>Pnca</i> <sup>1</sup>                                           | <i>Bbcm</i> <sup>2</sup>                                           |
| Z, Calculated density           | 4, 2.525 g/cm <sup>3</sup>                                         | 8, 2.511 g/cm <sup>3</sup>                                         | 8, 2.503 g/cm <sup>3</sup>                                         |
| a (Å)                           | 11.8937(4)                                                         | 22.5314(7)                                                         | 22.4485(6)                                                         |
| b (Å)                           | 19.0986(6)                                                         | 18.9885(8)                                                         | 18.9653(5)                                                         |
| c (Å)                           | 7.8047(2)                                                          | 7.8845(3)                                                          | 7.9488(2)                                                          |
| β/°                             | 108.9080(10)                                                       | 90                                                                 | 90                                                                 |
| F(000)                          | 1168.0                                                             | 2336.0                                                             | 2256.0                                                             |
| Theta range for data collection | 4.266-55.228°                                                      | 5.594-54.976°                                                      | 4.296-55.014°                                                      |
| Limiting indices                | -15 ≤ h ≤ 15                                                       | -29 ≤ h ≤ 28                                                       | -27 ≤ h ≤ 29                                                       |
|                                 | -24 ≤ k ≤ 24                                                       | -21 ≤ k ≤ 24                                                       | -24 ≤ k ≤ 24                                                       |
|                                 | -10 ≤ l ≤ 10                                                       | -9 ≤ l ≤ 10                                                        | -10 ≤ l ≤ 10                                                       |
| Reflections collected/unique    | 31235/3863<br><i>R<sub>int</sub></i> =0.0627                       | 19130/3868<br><i>R<sub>int</sub></i> =0.0882                       | 13466/2091<br><i>R<sub>int</sub></i> =0.0511                       |
| Completeness                    | 100%                                                               | 100%                                                               | 100%                                                               |
| Data/restraints/paraments       | 3862/36/131                                                        | 3868/44/129                                                        | 2093/74/89                                                         |
| Goodness-of-fit                 | 1.091                                                              | 1.005                                                              | 1.023                                                              |
| Final R indices<br>I > 2σ(I)    | <i>R</i> <sub>1</sub> =0.0313                                      | <i>R</i> <sub>1</sub> =0.0527                                      | <i>R</i> <sub>1</sub> =0.0454                                      |

1 Space group *Pnca* is a non-standard setting of space group Pbcn #60 in International Tables.

2 Space group *Bbcm* is a non-standard setting of space group Cmca #64 in International Tables.

**Table S2** N-H...Br Hydrogen bonds of **1** at LTP.

| D-H    | d(D-H) | d(H...A) | <DHA   | d(D...A) | A                        |
|--------|--------|----------|--------|----------|--------------------------|
| N2-H2A | 0.890  | 2.703    | 143.39 | 3.479    | Br4 [ x, y, z-1 ]        |
| N2-H2B | 0.890  | 2.902    | 145.01 | 3.667    | Br1 [ -x+1, -y+1, -z+1 ] |
| N2-H2B | 0.890  | 3.036    | 129.28 | 3.665    | Br5 [ -x+1, -y+1, -z+1 ] |
| N2-H2C | 0.890  | 2.691    | 168.21 | 3.567    | Br2                      |
| N1-H1A | 0.890  | 2.510    | 152.79 | 3.326    | Br3                      |
| N1-H1B | 0.890  | 2.597    | 156.52 | 3.432    | Br4 [ x, -y+1/2, z-1/2 ] |
| N1-H1C | 0.890  | 2.673    | 172.58 | 3.558    | Br3 [ x, -y+1/2, z+1/2 ] |

**Table S3** N-H...Br Hydrogen bonds of **1** at ITP

| D-H    | d(D-H) | d(H...A) | <DHA   | d(D...A) | A                        |
|--------|--------|----------|--------|----------|--------------------------|
| N2-H2A | 0.890  | 2.470    | 161.53 | 3.326    | Br2 [ x, -y+1/2, z+1/2 ] |
| N2-H2B | 0.890  | 2.622    | 157.40 | 3.460    | Br5                      |
| N2-H2C | 0.890  | 2.882    | 163.66 | 3.745    | Br2 [ x, y, z+1 ]        |
| N1-H1A | 0.890  | 3.062    | 139.73 | 3.785    | Br1 [ -x+1, -y, -z+1 ]   |
| N1-H1A | 0.890  | 2.897    | 140.77 | 3.630    | Br4 [ -x+1, -y, -z+1 ]   |
| N1-H1B | 0.890  | 2.657    | 157.24 | 3.495    | Br5                      |
| N1-H1C | 0.890  | 2.865    | 153.31 | 3.682    | Br3 [ x, y, z+1 ]        |

**Table S4** N-H...Br Hydrogen bonds of **1** at RTP.

| D-H    | d(D-H) | d(H..A) | <DHA   | d(D..A) | A                         |
|--------|--------|---------|--------|---------|---------------------------|
| N1-H1A | 0.890  | 2.904   | 133.66 | 3.577   | Br1 [ x+1/2, y, -z+1/2 ]  |
| N2-H1B | 0.890  | 2.884   | 138.93 | 3.603   | Br2 [ -x+1, -y+1, -z+1 ]  |
| N1-H1C | 0.89   | 3.010   | 123.35 | 3.577   | Br1 [ x+1/2, y, z+1/2 ]   |
| N2-H2C | 0.890  | 3.001   | 126.78 | 3.605   | Br1 [ x, -y+3/2, -z+1/2 ] |
| N2-H2C | 0.890  | 3.113   | 128.54 | 3.733   | Br3 [ x, y, -z+1 ]        |
| N2-H2D | 0.890  | 2.740   | 164.55 | 3.605   | Br1 [ x, -y+3/2, z+1/2 ]  |
| N1-H2E | 0.890  | 2.490   | 157.91 | 3.331   | Br4                       |
